# Supplementary material for: Sensor Validation and Diagnostic Potential of Smartwatches in Movement Disorders
Source: Preprints.org preprint supplement (doi:10.20944/preprints202103.0542.v1), 2021-03-22
Supplement: Supplementary file 2 [file supplementary]

| <b>Condition<br/>(DD: Other<br/>Movement<br/>Disorders)</b> | <b>Disease Comment (German)</b> | <b>Age (y)</b> | <b>Gender</b> |
|-------------------------------------------------------------|---------------------------------|----------------|---------------|
| Healthy                                                     |                                 | 65             | f             |
| Healthy                                                     |                                 | 35             | f             |
| Healthy                                                     |                                 | 49             | m             |
| Healthy                                                     |                                 | 50             | f             |
| Healthy                                                     |                                 | 42             | f             |
| Healthy                                                     |                                 | 69             | m             |
| Healthy                                                     |                                 | 56             | m             |
| Healthy                                                     |                                 | 75             | f             |
| Healthy                                                     |                                 | 54             | f             |
| Healthy                                                     |                                 | 79             | f             |
| Healthy                                                     |                                 | 90             | m             |
| Healthy                                                     |                                 | 88             | f             |
| Healthy                                                     |                                 | 49             | m             |
| Healthy                                                     |                                 | 48             | f             |
| Healthy                                                     |                                 | 80             | m             |
| Healthy                                                     |                                 | 84             | f             |
| Healthy                                                     |                                 | 80             | m             |
| Healthy                                                     |                                 | 67             | f             |
| Healthy                                                     |                                 | 52             | f             |
| Healthy                                                     |                                 | 48             | m             |
| Healthy                                                     |                                 | 72             | f             |
| Healthy                                                     |                                 | 54             | f             |
| Healthy                                                     |                                 | 67             | f             |
| Healthy                                                     |                                 | 44             | f             |
| Healthy                                                     |                                 | 56             | m             |
| Healthy                                                     |                                 | 63             | m             |
| Healthy                                                     |                                 | 40             | m             |
| Healthy                                                     |                                 | 56             | m             |
| Healthy                                                     |                                 | 42             | f             |
| Healthy                                                     |                                 | 48             | f             |
| Healthy                                                     |                                 | 58             | f             |
| Healthy                                                     |                                 | 76             | f             |
| Healthy                                                     |                                 | 81             | m             |
| Healthy                                                     |                                 | 76             | f             |
| Healthy                                                     |                                 | 81             | m             |
| Healthy                                                     |                                 | 51             | f             |
| Healthy                                                     |                                 | 61             | f             |
| Healthy                                                     |                                 | 38             | m             |
| Healthy                                                     |                                 | 60             | m             |
| Healthy                                                     |                                 | 64             | m             |

|         |  |    |   |
|---------|--|----|---|
| Healthy |  | 64 | m |
|---------|--|----|---|

|         |    |   |
|---------|----|---|
| Healthy | 43 | f |
| Healthy | 64 | m |
| Healthy | 52 | f |
| Healthy | 69 | f |
| Healthy | 66 | f |
| Healthy | 61 | f |
| Healthy | 40 | f |
| Healthy | 67 | f |
| Healthy | 70 | m |
| Healthy | 71 | f |
| Healthy | 52 | f |
| Healthy | 45 | m |
| Healthy | 35 | m |
| Healthy | 65 | m |
| Healthy | 85 | m |
| Healthy | 40 | f |
| Healthy | 78 | f |
| Healthy | 61 | f |
| Healthy | 56 | m |
| Healthy | 68 | m |
| Healthy | 72 | f |
| Healthy | 38 | f |
| Healthy | 67 | m |
| Healthy | 55 | f |
| Healthy | 79 | f |
| Healthy | 61 | f |
| Healthy | 69 | f |
| Healthy | 77 | m |
| Healthy | 62 | f |
| Healthy | 61 | f |
| Healthy | 64 | m |
| Healthy | 66 | f |
| Healthy | 58 | f |
| Healthy | 54 | f |
| Healthy | 71 | f |
| Healthy | 57 | m |
| Healthy | 49 | f |
| Healthy | 66 | f |
| Healthy | 63 | f |
| Healthy | 70 | f |
| Healthy | 60 | f |

|             |                                                                                                            |    |   |
|-------------|------------------------------------------------------------------------------------------------------------|----|---|
| Healthy     |                                                                                                            | 54 | f |
| Healthy     |                                                                                                            | 83 | m |
| Healthy     |                                                                                                            | 76 | f |
| Healthy     |                                                                                                            | 57 | f |
| Healthy     |                                                                                                            | 45 | f |
| Healthy     |                                                                                                            | 48 | f |
| Healthy     |                                                                                                            | 65 | m |
| Parkinson's | THSiPS vom Tremordominanztyp                                                                               | 51 | m |
| Parkinson's | IPS vom hypokinetisch-rigiden Typ                                                                          | 70 | m |
| Parkinson's | IPS vom Äquivalenztyp                                                                                      | 68 | m |
| Parkinson's | IPS vom akinetisch-rigiden Typ                                                                             | 72 | m |
| Parkinson's | IPS vom Äquivalenztyp.                                                                                     | 57 | m |
| Parkinson's | IPS vom Äquivalenztyp.TH.S.                                                                                | 53 | m |
| Parkinson's | IPS vom hypokinetisch-rigiden Typ                                                                          | 78 | m |
| Parkinson's | IPS vom hypokinetisch rigiden Typ                                                                          | 73 | m |
| Parkinson's | IPS vom akinetisch-rigiden Typ                                                                             | 72 | m |
| Parkinson's | IPS vom Äquivalenztyp                                                                                      | 78 | m |
| Parkinson's | IPS vom Tremordominanztyp. V.a.                                                                            | 59 | m |
|             | Restless-Legs-Syndrom.TH.S.                                                                                |    |   |
| Parkinson's | IPS vom hypokinetisch-rigiden Typ                                                                          | 84 | m |
| Parkinson's | IPS vom akinetisch-rigiden Typ                                                                             | 80 | m |
| Parkinson's | IPS vom hypokinetisch-rigiden Typ                                                                          | 59 | m |
| Parkinson's | IPS vom akinetisch-rigiden Typ                                                                             | 51 | m |
| Parkinson's | IPS vom Tremordominanztyp                                                                                  | 75 | m |
| Parkinson's |                                                                                                            | 75 | m |
| Parkinson's | IPS vom hypokinetisch-rigiden Typ                                                                          | 73 | m |
| Parkinson's |                                                                                                            | 75 | m |
| Parkinson's | THSiPS vom Aequivalenztyp                                                                                  | 47 | m |
| Parkinson's |                                                                                                            | 55 | f |
| Parkinson's |                                                                                                            | 65 | m |
| Parkinson's | Periodische Beinbewegungen im Schlaf, vorwiegend ohne korrelierende Arousals.Lewy-Körperchen-Demenz (LBD). | 59 | m |
| Parkinson's | IPS vom akinetisch-rigiden Typ.                                                                            | 75 | m |
| Parkinson's | IPS vom akinetisch-rigiden Typ                                                                             | 71 | m |
| Parkinson's | IPS vom Äquivalenztyp                                                                                      | 68 | m |
| Parkinson's | IPS vom akinetisch-rigiden Typ.                                                                            | 67 | m |
| Parkinson's | IPS vom Tremordominanztyp                                                                                  | 59 | m |
| Parkinson's | IPS vom hypokinetisch-rigiden Typ.                                                                         | 53 | f |
| Parkinson's | IPS vom hypokinetisch-rigiden Typ.                                                                         | 56 | f |
| Parkinson's | IPS vom hypokinetisch-rigiden Typ.                                                                         | 74 | m |
| Parkinson's | IPS vom Äquivalenztyp.TH.S.Essentieller Tremor.                                                            | 47 | m |
| Parkinson's | IPS vom akinetisch-rigiden Typ.                                                                            | 63 | f |

|             |                                                       |    |   |
|-------------|-------------------------------------------------------|----|---|
| Parkinson's | IPS vom Äquivalenztyp                                 | 67 | m |
| Parkinson's | IPS vom hypokinetisch-rigiden Typ                     | 74 | m |
| Parkinson's | IPS vom hypokinetisch-rigiden Typ                     | 55 | m |
| Parkinson's | IPS vom akinetisch rigiden Typ                        | 65 | f |
| Parkinson's | Tremor-Dominanztyp                                    | 75 | f |
| Parkinson's | Tremor-DominanztypSWEDD                               | 56 | m |
| Parkinson's | AequivalenztypTHS                                     | 56 | m |
| Parkinson's | Aequivalenztyp                                        | 77 | m |
| Parkinson's | IPS vom hypokinetisch-rigiden Typ                     | 77 | m |
| Parkinson's | IPS                                                   | 61 | m |
| Parkinson's | IPS vom hypokinetisch-rigiden Typ.                    | 71 | m |
| Parkinson's | IPS vom Äquivalenztyp                                 | 53 | m |
| Parkinson's | Ruhetremor rechtsiPS vom Tremorsomi-<br>nanztyp       | 82 | f |
| Parkinson's | IPS vom hypokinetisch-rigiden Typ                     | 69 | m |
| Parkinson's | iPS vom hypokinetisch rigiden Typ                     | 64 | m |
| Parkinson's | Hypokinetisch rigides iPS                             | 63 | f |
| Parkinson's | Hypokinetisch rigides iPS                             | 65 | f |
| Parkinson's | Hypokinetisch rigides iPS THS                         | 73 | f |
| Parkinson's | IPS vom Äquivalenztyp                                 | 57 | f |
| Parkinson's | iPS von hypokinetisch rigiden Typ                     | 71 | f |
| Parkinson's | IPS vom Äquivalenztyp                                 | 62 | m |
| Parkinson's | IPS vom Äquivalenztyp                                 | 83 | m |
| Parkinson's | IPS vom hypokinetisch-rigiden Typ                     | 77 | m |
| Parkinson's | IPS vom hypokinetisch-rigiden Typ                     | 65 | m |
| Parkinson's | IPS vom Äquivalenztyp.                                | 64 | m |
| Parkinson's | IPS vom Äquivalenztyp                                 | 57 | f |
| Parkinson's | IPS vom Tremordominanztyp                             | 58 | f |
| Parkinson's | IPS vom hypokinetisch-rigiden Typ                     | 75 | m |
| Parkinson's | IPS vom Äquivalenztyp                                 | 74 | m |
| Parkinson's | Beginnende Multisystematrophie vom<br>Parkinson-Typ   | 71 | m |
| Parkinson's | IPS vom Tremordominanztyp                             | 71 | m |
| Parkinson's | IPS vom TremordominanztypTremor links<br>bei Rechnung | 63 | m |
| Parkinson's | IPS vom Äquivalenztyp.TH.S.                           | 61 | f |
| Parkinson's | IPS vom Tremordominanztyp.Essentieller<br>Tremor.     | 78 | m |
| Parkinson's | IPS vom Äquivalenztyp.Essentieller<br>Tremor.         | 74 | m |
| Parkinson's | IPS vom hypokinetisch rigiden Typ Hyper-<br>tonie     | 70 | m |
| Parkinson's | IPS vom akinetisch-rigiden Typ.                       | 75 | m |
| Parkinson's | IPS Äquivalenztyp.Restless-Legs-Syndrom.              | 83 | f |

|             |                                                                                              |    |   |
|-------------|----------------------------------------------------------------------------------------------|----|---|
| Parkinson's | IPS vom Äquivalenztyp                                                                        | 63 | f |
| Parkinson's | IPS vom akinetisch-rigiden Typ                                                               | 67 | f |
| Parkinson's | IPS vom Tremordominanztyp. Restless Legs-Syndrom.                                            | 63 | f |
| Parkinson's | IPS vom akinetisch-rigiden Typ                                                               | 79 | f |
| Parkinson's | iPS vom Äquivalenztyp                                                                        | 70 | f |
| Parkinson's | IPS vom akinetisch-rigiden Typ                                                               | 54 | f |
| Parkinson's | IPS vom akinetisch-rigiden Typ. THS.                                                         | 54 | m |
| Parkinson's | iPS vom Tremordominanztyp DD monosymptomatischer Tremor                                      | 72 | m |
| Parkinson's | IPS vom hypokinetisch-rigiden Typ                                                            | 65 | m |
| Parkinson's | IPS vom akinetisch-rigiden Typ.                                                              | 54 | m |
| Parkinson's | IPS vom hypokinetisch-rigiden Typ                                                            | 74 | m |
| Parkinson's | IPS vom akinetisch-rigiden Typ                                                               | 51 | f |
| Parkinson's | IPS vom Äquivalenztyp. Restless-Legs-Syndrom.                                                | 81 | f |
| Parkinson's | IPS vom Tremordominanztyp                                                                    | 69 | m |
| Parkinson's | IPS vom akinetisch rigiden Typ. THS.                                                         | 65 | m |
| Parkinson's | Parkinson-Syndrom vom Äquivalenztyp noch unklarer Zuordnung, DD: vaskulär, idiopathisch.     | 56 | f |
| Parkinson's | IPS vom Tremordominanztyp                                                                    | 80 | f |
| Parkinson's | IPS vom akinetisch-rigiden Typ                                                               | 66 | f |
| Parkinson's | IPS vom Äquivalenztyp. Essentieller Tremor.                                                  | 88 | m |
| Parkinson's | IPS, bisher unbehandelt.                                                                     | 55 | f |
| Parkinson's | iPS vom Tremordominanztyp                                                                    | 67 | m |
| Parkinson's | Bewegungsstörung unklarer Ätiologie a.e. genetisch; kein Hinweis einer Parkinson-erkrankung. | 49 | m |
| Parkinson's | IPS vom Tremordominanztyp. Restless-Legs-Syndrom.                                            | 58 | m |
| Parkinson's | IPS vom akinetisch-rigiden Verlaufstyp.                                                      | 55 | f |
| Parkinson's | IPS vom Äquivalenztyp.                                                                       | 65 | m |
| Parkinson's | IPS vom akinetisch-rigiden Verlaufstyp                                                       | 74 | m |
| Parkinson's | IPS vom Äquivalenztyp                                                                        | 68 | m |
| Parkinson's | IPS vom hypokinetisch-rigiden Verlaufstyp.                                                   | 78 | f |
| Parkinson's | IPS vom Äquivalenztyp                                                                        | 79 | f |
| Parkinson's | IPS vom Äquivalenztyp                                                                        | 65 | f |
| Parkinson's | IPS vom Äquivalenztyp THS                                                                    | 49 | m |
| Parkinson's | IPS vom Äquivalenztyp. THS.                                                                  | 69 | m |
| Parkinson's | R25.1 IPS mit Dystonie                                                                       | 42 | m |
| Parkinson's | IPS akinetisch rigider Typ                                                                   | 78 | m |
| Parkinson's | IPS vom Äquivalenztyp                                                                        | 68 | f |

|             |                                                                       |    |   |
|-------------|-----------------------------------------------------------------------|----|---|
| Parkinson's | IPS vom Tremordominanztyp                                             | 61 | m |
| Parkinson's | IPS vom Tremordominanztyp                                             | 73 | m |
| Parkinson's | IPS vom Äquivalenztyp                                                 | 70 | f |
| Parkinson's | IPS vom Äquivalenztyp                                                 | 68 | m |
| Parkinson's | Vaskuläres L-Dopa-responsives hypokinetisch rigides Parkinson-Syndrom | 67 | m |
| Parkinson's | IPS vom Tremordominanztyp                                             | 72 | m |
| Parkinson's | IPS vom hypokinetisch rigiden Typ                                     | 77 | m |
| Parkinson's | IPS vom Tremordominanztyp                                             | 68 | m |
| Parkinson's | IPS vom hypokinetisch rigiden Typ                                     | 64 | m |
| Parkinson's | IPS vom Äquivalenztyp                                                 | 69 | f |
| Parkinson's | IPS vom hypokinetisch rigiden Typ, z. N. Endocarditis                 | 66 | m |
| Parkinson's | IPS vom akinetisch rigider Typ                                        | 64 | m |
| Parkinson's | IPS vom Tremordominanztyp                                             | 60 | m |
| Parkinson's | IPS Äquivalenztyp                                                     | 79 | m |
| Parkinson's | IPS vom akinetisch rigider Typ                                        | 69 | m |
| Parkinson's | IPS vom akinetisch rigiden Typ                                        | 68 | m |
| Parkinson's | Ips vom Tremordominanztyp                                             | 81 | m |
| Parkinson's | Ips vom hypokinetisch rigiden Typ THS                                 | 56 | m |
| Parkinson's | IPS vom akinetisch-rigiden Verlaufstyp                                | 78 | f |
| Parkinson's | Beginnendes IPS vom Tremordominanztyp                                 | 47 | m |
| Parkinson's |                                                                       | 70 | m |
| Parkinson's | Ips vom Äquivalenztyp                                                 | 73 | f |
| Parkinson's | Ips vom Äquivalenztyp THS                                             | 78 | m |
| Parkinson's | IPS vom hypokinetisch-rigiden Typ                                     | 51 | f |
| Parkinson's | IPS vom Tremordominanztyp                                             | 78 | m |
| Parkinson's | Atypisches Parkinsonsyndrom mit ortho-statischer Dysregulation        | 74 | m |
| Parkinson's | IPS vom Tremordominanztyp                                             | 62 | m |
| Parkinson's | IPS vom akinetisch-rigiden Verlaufstyp                                | 63 | m |
| Parkinson's | IPS vom hypokinetisch-rigiden Typ                                     | 73 | m |
| Parkinson's | IPS vom hypokinetisch-rigiden Typ                                     | 74 | m |
| Parkinson's | IPS vom akinetisch-rigiden Typ                                        | 78 | m |
| Parkinson's | IPS vom Äquivalenztyp.Schwer ausgeprägtes Restless-Legs-Syndrom. THS. | 68 | m |
| Parkinson's | IPS vom Äquivalenztyp.                                                | 66 | m |
| Parkinson's | IPS vom Äquivalenztyp.                                                | 64 | m |
| Parkinson's | Hypertonie                                                            | 87 | m |
| Parkinson's | IPS vom hypokinetisch-rigiden Typ                                     | 47 | m |
| Parkinson's | IPS vom hypokinetisch rigiden Typ                                     | 75 | m |
| Parkinson's | IPS vom Äquivalenztyp. Restless-Legs-Syndrom.                         | 67 | f |
| Parkinson's | IPS vom Tremordominanztyp                                             | 66 | m |

|             |                                                                                                                                         |    |   |
|-------------|-----------------------------------------------------------------------------------------------------------------------------------------|----|---|
| Parkinson's | IPS vom Äquivalenztyp                                                                                                                   | 67 | m |
| Parkinson's | Parkinsonsyndrom mit rechtsbetontem Rigor und Tremor der oberen Extremität                                                              | 76 | m |
| Parkinson's | IPS vom Äquivalenztyp                                                                                                                   | 66 | m |
| Parkinson's | IPS vom akinetisch-rigiden Verlaufstyp                                                                                                  | 49 | m |
| Parkinson's | IPS vom akinetisch-rigiden Typ                                                                                                          | 67 | m |
| Parkinson's | IPS vom Äquivalenztyp Ausgeprägte orthostatische Dysregulation                                                                          | 73 | f |
| Parkinson's | Linksbetontes hypokinetisch rigides Parkinsonsyndrom DD atypisches Parkinsonsyndrom                                                     | 63 | f |
| Parkinson's | IPS vom Äquivalenztyp                                                                                                                   | 75 | m |
| Parkinson's | IPS vom Äquivalenztyp                                                                                                                   | 53 | m |
| Parkinson's | IPS vom Äquivalenztyp                                                                                                                   | 55 | m |
| Parkinson's | IPS vom Äquivalenztyp                                                                                                                   | 62 | m |
| Parkinson's | IPS vom Tremordominanztyp.Symptomatisches Restless-Legs-Syndrom.                                                                        | 85 | m |
| Parkinson's | IPS vom Äquivalenztyp                                                                                                                   | 74 | f |
| Parkinson's | Ips vom Tremordominanztyp                                                                                                               | 71 | m |
| Parkinson's | IPS vom Tremordominanztyp                                                                                                               | 66 | f |
| Parkinson's | IPS vom hypokinetisch-rigiden Typ, kein TremorTHS                                                                                       | 58 | f |
| Parkinson's | IPS vom Tremordominanztyp, ausgeprägter Tremor im gesamten linken Arm.THs.Das Gerät zur THS wurde direkt vor der Messung ausgeschaltet. | 46 | m |
| Parkinson's | IPS vom akinetisch-rigiden Typ.THs.                                                                                                     | 54 | f |
| Parkinson's | IPS vom Äquivalenztyp                                                                                                                   | 69 | m |
| Parkinson's | IPS vom Äquivalenztyp.Lähmung im rechten Arm.                                                                                           | 62 | m |
| Parkinson's | IPS vom Äquivalenztyp THS                                                                                                               | 63 | m |
| Parkinson's | IPS vom Äquivalenztyp                                                                                                                   | 71 | m |
| Parkinson's | IPS vom akinetisch-rigiden Typ                                                                                                          | 71 | m |
| Parkinson's | Ips vom akinetisch rigiden TypTHS                                                                                                       | 75 | f |
| Parkinson's | IPS vom Äquivalenztyp                                                                                                                   | 78 | m |
| Parkinson's | IPS vom Äquivalenztyp                                                                                                                   | 78 | m |
| Parkinson's | IPS vom hypokinetisch-rigiden Typ                                                                                                       | 55 | m |
| Parkinson's | IPS vom Tremordominanztyp                                                                                                               | 50 | f |
| Parkinson's | IPS vom Tremordominanztyp.                                                                                                              | 54 | f |
| Parkinson's | IPS vom hypokinetisch-rigiden Typ                                                                                                       | 70 | m |
| Parkinson's | IPS vom akinetisch-rigiden Typ                                                                                                          | 56 | m |
| Parkinson's | IPS vom Äquivalenztyp.THs.                                                                                                              | 58 | m |
| Parkinson's | iPS vom hypokinetisch rigiden Typ                                                                                                       | 60 | f |



|             |                                                                      |    |   |
|-------------|----------------------------------------------------------------------|----|---|
| Parkinson's | Ips vom akinetisch rigiden Typ                                       | 59 | m |
| Parkinson's | Ips vom akinetisch rigiden Typ                                       | 66 | m |
| Parkinson's | IPS vom hypokinetisch-rigiden Typ                                    | 67 | m |
| Parkinson's | IPS vom Tremordominanztyp.Schweres sekundäres Restless-Legs-Syndrom. | 65 | m |
| Parkinson's | IPS vom Äquivalenztyp. THS.                                          | 78 | m |
| Parkinson's | IPS vom hypokinetisch-rigiden Typ.                                   | 47 | f |
| Parkinson's | IPS vom hypokinetisch-rigiden Typ                                    | 69 | m |
| Parkinson's | IPS vom Äquivalenztyp                                                | 80 | m |
| Parkinson's | IPS vom akinetisch-rigiden Typ.                                      | 78 | m |
| Parkinson's | IPS vom akinetisch-rigiden Typ                                       | 64 | f |
| Parkinson's | IPS vom akinetisch-rigiden Typ                                       | 70 | m |
| Parkinson's | IPS vom hypokinetisch-rigiden Typ.TH.S.                              | 51 | m |
| Parkinson's | IPS vom hypokinetisch-rigiden Typ.                                   | 70 | m |
| Parkinson's | IPS vom Äquivalenztyp.Periodische Beinbewegungen im Schlaf.          | 74 | m |
| Parkinson's | IPS vom Tremordominanztyp                                            | 53 | m |
| Parkinson's | IPS vom hypokinetisch-rigiden Typ                                    | 53 | m |
| Parkinson's | IPS vom akinetisch-rigiden Typ                                       | 46 | f |
| Parkinson's | IPS.Sekundär progredient verlaufende Multiple Sklerose.              | 57 | m |
| Parkinson's | IPS vom Äquivalenztyp                                                | 73 | m |
| Parkinson's | IPS vom hypokinetisch-rigiden Typ.TH.S.                              | 67 | m |
| Parkinson's | IPS vom Äquivalenztyp                                                | 73 | m |
| Parkinson's | IPS vom Äquivalenztyp                                                | 66 | m |
| Parkinson's | IPS vom Äquivalenztyp.TH.S.                                          | 66 | m |
| Parkinson's | IPS vom Tremordominanztyp                                            | 64 | m |
| Parkinson's | IPS vom hypokinetisch-rigiden Typ. TH.S.                             | 61 | m |
| Parkinson's | IPS vom Äquivalenztyp                                                | 52 | m |
| Parkinson's | IPS vom Tremordominanztyp                                            | 54 | f |
| Parkinson's | IPS vom Äquivalenztyp                                                | 61 | m |
| Parkinson's | IPS vom Tremordominanztyp                                            | 72 | f |
| Parkinson's | IPS vom Tremordominanztyp.TH.S.                                      | 51 | m |
| Parkinson's | IPS vom Äquivalenztyp                                                | 65 | m |
| Parkinson's | IPS vom hypokinetisch-rigiden Typ                                    | 56 | m |
| Parkinson's | IPS vom Tremordominanztyp                                            | 72 | m |
| Parkinson's | IPS vom Tremordominanztyp                                            | 53 | m |
| Parkinson's | IPS vom Tremordominanztyp                                            | 67 | f |
| Parkinson's | IPS mit zunehmender Gangstörung und Sturzneigung                     | 65 | m |
| Parkinson's | IPS vom Tremordominanztyp                                            | 75 | m |
| Parkinson's | IPS vom Tremordominanztyp                                            | 77 | f |
| Parkinson's | IPS vom hypokinetisch rigiden TypTHS                                 | 61 | m |
| Parkinson's | IPS hypokinetisch rigiden Typ                                        | 69 | m |

|             |                                                                                                                                                                                                                      |    |   |
|-------------|----------------------------------------------------------------------------------------------------------------------------------------------------------------------------------------------------------------------|----|---|
| Parkinson's | Ips hypokinetisch rigiden Typ                                                                                                                                                                                        | 49 | f |
| Parkinson's | Ips vom Äquivalenztyp                                                                                                                                                                                                | 79 | f |
| Parkinson's | IPS vom Tremordominanztyp                                                                                                                                                                                            | 77 | m |
| Parkinson's | IPS vom akinetisch-rigiden Typ                                                                                                                                                                                       | 69 | f |
| Parkinson's | IPS vom Äquivalenztyp                                                                                                                                                                                                | 72 | m |
| Parkinson's | IPS vom Tremordominanztyp                                                                                                                                                                                            | 70 | f |
| Parkinson's | IPS vom Tremordominanztyp                                                                                                                                                                                            | 75 | m |
| Parkinson's | IPS hypokinetisch rigiden Typ                                                                                                                                                                                        | 81 | m |
| Parkinson's | IPS DD MSA                                                                                                                                                                                                           | 63 | m |
| Parkinson's | IPS akinetisch rigiden Verlauf                                                                                                                                                                                       | 58 | f |
| Parkinson's | IPS vom Äquivalenztyp                                                                                                                                                                                                | 70 | f |
| Parkinson's |                                                                                                                                                                                                                      | 63 | m |
| Parkinson's | IPS + THS                                                                                                                                                                                                            | 48 | m |
| Parkinson's | IPS Tremordominanztyp mit THS                                                                                                                                                                                        | 55 | f |
| Parkinson's | iPS vom hypokinetisch rigiden TypTHSVor Optimierung                                                                                                                                                                  | 61 | m |
| Parkinson's | IPS vom Hypokinetisch rigiden Typ THS                                                                                                                                                                                | 49 | f |
| Parkinson's | IPS DD essentieller Tremor                                                                                                                                                                                           | 69 | m |
| Parkinson's | IPS vom Tremordominanztyp                                                                                                                                                                                            | 42 | f |
| Parkinson's | IPS vom Äquivalenztyp                                                                                                                                                                                                | 76 | m |
| Parkinson's | IPS vom akinetisch-rigiden Verlaufstyp,THS: ja,Duodopapumpe                                                                                                                                                          | 57 | f |
| Parkinson's | IPS vom hypokinetisch rigiden                                                                                                                                                                                        | 72 | m |
| Parkinson's | PolyneuropathieArterielle Hypertoniekoronare HerzkrankheitHypertriglyceridaemieMilde Pankreatitis und milde Refluxoesohagitisz.n. Bandscheibenvorfall-OPZ.n. Hemilaminektomie und RevisionZ.n. Humeruskopffraktur re | 66 | m |
| Parkinson's | Diabetes mellitus PolyneuropathieRestless legsArterielle hypertonieKatarakt bds.                                                                                                                                     | 73 | f |
| Parkinson's | IPS vom Äquivalenztyp,THS: ja                                                                                                                                                                                        | 50 | m |
| Parkinson's | IPS vom hypokinetisch-rigiden Typ,Testung Duodopapumpe                                                                                                                                                               | 76 | f |
| Parkinson's | IPS vom Tremordominanztyp,aktuell Zustand nach THS                                                                                                                                                                   | 56 | m |
| Parkinson's | IPS vom Äquivalenztyp, THS: nein                                                                                                                                                                                     | 71 | m |
| Parkinson's | IPS vom hypokinetisch-rigiden Typ,THS: nein                                                                                                                                                                          | 69 | m |
| Parkinson's | IPS vom hypokinetisch-rigiden Verlaufstyp,aktuell Anlage Duodopapumpe                                                                                                                                                | 72 | f |
| Parkinson's | Inzipientes idiopathisches Parkinsonsyndrom                                                                                                                                                                          | 85 | m |
| Parkinson's | IPS vom hypokinetisch-rigiden Typ,komplexe Dyskinesien                                                                                                                                                               | 67 | f |

|             |                                                                                                                    |    |   |
|-------------|--------------------------------------------------------------------------------------------------------------------|----|---|
| Parkinson's | V. a. PSP-RSanamnestic war vor ca 3 Jahren ein IPS vom Aequivalenztyp diagnostiziert worden                        | 76 | m |
| Parkinson's | Multisystematrophie vom Parkinson-Typ                                                                              | 64 | m |
| Parkinson's | Multisystematrophie vom Parkinsonstyp                                                                              | 61 | f |
| Parkinson's | IPS vom akinetisch-rigiden Verlaufstyp                                                                             | 68 | f |
| Parkinson's | IPS vom akinetisch rigiden Typ                                                                                     | 66 | m |
| Parkinson's | Essentieller Tremor DD IPS                                                                                         | 69 | m |
| Parkinson's | Essentieller Tremor DD IPS                                                                                         | 69 | m |
| DD          | Essentieller Tremor                                                                                                | 57 | m |
| DD          | Essentieller TremorTHS                                                                                             | 70 | m |
| DD          | Essentieller Tremor                                                                                                | 78 | f |
| DD          | Essentieller Tremor. THS.                                                                                          | 59 | f |
| DD          | Essentieller Tremor                                                                                                | 63 | m |
| DD          | Essentieller Tremor                                                                                                | 69 | m |
| DD          | Essentieller Tremor                                                                                                | 54 | m |
| DD          | EtTHS                                                                                                              | 79 | m |
| DD          | ET +Oromandibuläre Dystonie, ws Risperidon-assoziiert                                                              | 70 | m |
| DD          | Essentieller Tremor des Kopfes sowie der Haende.THs.                                                               | 61 | f |
| DD          | Essentieller Tremor                                                                                                | 64 | f |
| DD          | Essentieller Tremor.                                                                                               | 72 | m |
| DD          | Essentieller Tremor.Periodische Beimbewegungen im Wachzustand und im Schlaf.Restless-Legs-Syndrom bei Eisenmangel. | 72 | m |
| DD          | Essentieller Tremor.THs.                                                                                           | 61 | m |
| DD          | Essentieller Tremor.V.a. zusätzliche Komponente DD parkinsonoid/psychogen.                                         | 52 | f |
| DD          | Essentieller Tremor.THs.                                                                                           | 82 | m |
| DD          |                                                                                                                    | 79 | f |
| DD          | Essentieller Tremor                                                                                                | 64 | m |
| DD          | ET seit sie denken kann                                                                                            | 45 | f |
| DD          | Essentieller Tremor                                                                                                | 77 | f |
| DD          | Essentieller Tremor                                                                                                | 49 | m |
| DD          | Keine                                                                                                              | 62 | m |
| DD          | aktuell Testung vor Implantation tiefe Hirnstimulation                                                             | 50 | f |
| DD          | Z.n. THs, aktuell Optimierung THs                                                                                  | 78 | f |
| DD          | Belanger Temporallapenepilepsie                                                                                    | 57 | f |
| DD          | Swedd und Verdacht auf psychogenen oder funktionellen Tremor.                                                      | 41 | f |

|    |                                                                                                        |    |   |
|----|--------------------------------------------------------------------------------------------------------|----|---|
| DD | multiple sklerose                                                                                      | 67 | f |
| DD | MSA-C                                                                                                  | 67 | f |
| DD | Idiopathische generalisierte DystonieTHS                                                               | 66 | f |
| DD | Spätdyskinesien nach neuroleptischer Therapie.                                                         | 53 | f |
| DD | Dystonie-Parkinson-Syndrom, möglicherweise genetisch bedingt.                                          | 51 | m |
| DD | Tremor unbekannter UrsacheV.a neurodegenerative Erkrankung Lewy-Körperchen-Demenz DD Alzheimer Demenz  | 83 | f |
| DD | Atypisches Parkinson Syndrom DD PSP                                                                    | 79 | m |
| DD | Multisystematrophie vom Parkinson-Typ (MSA-P)                                                          | 58 | m |
| DD | L-Dopa-responsive Dystonie.                                                                            | 51 | f |
| DD | Linksbetonter Ruhetremor und Hypokinese ohne präsynaptisches striatales Defizit                        | 81 | m |
| DD | Funktionelle Bewegungsstörung, am ehesten reaktiv infolge des Schmerzsyndromes.                        | 33 | m |
| DD | Lewy Körperchen Erkrankung mit Halte-tremor                                                            | 73 | m |
| DD | Beginnendes Parkinson-Syndrom DD Altersabhängiger Tremor DD asymmetrischer essentieller Tremor         | 69 | m |
| DD | MSA vom zerebellären Typ                                                                               | 67 | m |
| DD | Medikamentöse-toxischer TremorVermutlich durch Valproat                                                | 60 | f |
| DD | Dystoner Kopftremor, anamnestisch auch generalisierter Tremor/Dystonie                                 | 41 | f |
| DD | Frühkindlicher hypoxischer Hirnschaden mit symptomatischer generalisierter linksbetonter Dystonie/ THS | 52 | m |
| DD | Idiopathische Polyneuropathie mit Ataxie und Tremor - DD hereditär, DD inflammatorisch                 | 65 | f |
| DD | Leukencephalopathie ungeklärter Ätiologie                                                              | 48 | f |

|    |                                                                                                                                                                                                                   |    |   |
|----|-------------------------------------------------------------------------------------------------------------------------------------------------------------------------------------------------------------------|----|---|
| DD | Normaldruckhydrocephalus möglich DD beginnendes Parkinsonsyndrom mit zusätzlicher funktioneller Ausgestaltung. Beim Gewicht halten Rechts ist das Gewicht aus der Hand gerutscht, da die Kraft fehlte zum Halten. | 63 | m |
| DD | Paroxysmale kinesiogene Dyskinesie.                                                                                                                                                                               | 33 | f |
| DD | PSP vom Parkinsontyp.                                                                                                                                                                                             | 77 | m |
| DD | Asymmetrischer Tremor der Hände ungeklärter Ätiologie.                                                                                                                                                            | 59 | f |
| DD | Progressive supranukleäre Blickparese (PSP) a.e. Typ Richardson. Restless Legs Syndrom.                                                                                                                           | 74 | f |
| DD | Segmentale Dystonie. THS.                                                                                                                                                                                         | 46 | f |
| DD | Restless-Legs-Syndrom                                                                                                                                                                                             | 69 | f |
| DD | Multiple Sklerose                                                                                                                                                                                                 | 55 | m |
| DD | Spinozerebelläres Syndrom mit Kleinhirnatrophie FNV und KHV bds dyssymmetrisch mit Intentionstremor                                                                                                               | 69 | m |
| DD | Dystoner Tremor                                                                                                                                                                                                   | 85 | f |
| DD | Segmentale Dystonie                                                                                                                                                                                               | 60 | m |
| DD | Multisystematrophie vom kombinierten Typ.                                                                                                                                                                         | 77 | f |
| DD | Zervikale Dystonie                                                                                                                                                                                                | 68 | m |
| DD | Multiple Sklerose vom schubförmigen Verlaufstyp                                                                                                                                                                   | 49 | f |
| DD | Dystonie ungeklärter Ätiologie.                                                                                                                                                                                   | 51 | f |
| DD | Links betonter Ruhe-, Halte- und Intentionstremor, wahrscheinlich verstärkter physiologischer Tremor.                                                                                                             | 69 | m |
| DD | Klinisch diagnostizierte L-Dopa responsive Dystonie                                                                                                                                                               | 52 | f |
| DD | Multiple Sklerose, schubförmig verlaufend.                                                                                                                                                                        | 37 | m |
| DD | MSA vom Parkinsontyp                                                                                                                                                                                              | 67 | f |

|    |                                                                                    |    |   |
|----|------------------------------------------------------------------------------------|----|---|
| DD | Leichtgradige cervikale Dystonie.                                                  | 55 | f |
| DD | Generalisierte dystone Bewegungsstörung. THS.                                      | 35 | f |
| DD | Dystone Bewegungsstörung, Ja-Ja-Kopftremor Torticollis nach rechts. THS.           | 56 | f |
| DD | Chorea minor Sydenham                                                              | 48 | f |
| DD | Multiple Sklerose                                                                  | 51 | m |
| DD | Multiple Sklerose, schubförmig verlaufend.                                         | 54 | m |
| DD | Multiple Sklerose vom primär chronisch-progredienten Verlaufstyp                   | 62 | m |
| DD | Multiple Sklerose, anamnestic vom schubförmigen Verlaufstyp                        | 60 | f |
| DD | Zervikale Dystonie mit rotatorischem Torticollis nach rechts und Retrocollis. THS. | 69 | m |
| DD | Zervikale Dystonie mit tremorösem Torticollis, essentieller Tremor                 | 72 | m |
| DD | Adulte multifokale Dystonie ungeklärter Ätiologie                                  | 44 | f |
| DD | Zervikale Dystonie, THS                                                            | 56 | f |
| DD | MS vom sekundär chronisch progredienten Verlaufstyp                                | 40 | m |
| DD | Segmentale orofaziale Dystonie mit Blepharospasmus THS                             | 77 | f |
| DD | Tremoröser Torticollis nach links mit dystonem Tremor                              | 54 | f |
| DD |                                                                                    | 45 | f |
| DD |                                                                                    | 53 | m |
| DD | Torticollis nach links mit dystonem Tremor                                         | 54 | f |
| DD | ungeklärter Tremor, insbesondere Kopftremor                                        | 80 | f |
| DD | Grobschlägiger Ruhetremor rechts Ursache unbekannt                                 | 56 | f |
| DD | ET DD funktioneller Tremor Arm und Rechtsbetont                                    | 42 | f |
| DD | Leichter Kopftremor Asthma bronchiale Z.n. Perikarderguss                          | 21 | f |

|    |                                                                 |    |   |
|----|-----------------------------------------------------------------|----|---|
| DD | Rechtsbetonter Ruhr-,Halte-und Intention-                       | 68 | m |
| DD | tremor, wahrscheinlich Lithium-assoziiert<br>Zervikale Dystonie | 69 | m |
